# Supplementary material
Source: publisher figshare collection journal article supplement (https://gsapubs.figshare.com/ndownloader/files/37379215)
Supplement: Supplementary file 1 [file 37379215]

## Sheet: Table DR3
Locality	Rock used for dating	Age (Ma)	Ophiolite type	Tectonic setting	Dating method	Reference
South East Kunlun Suture
West Harguole	Gabbro	450 ± 2	N-MORB	Middle ocean ridge	LA-ICPMS zircon U-Pb	Pei et al., 2018
Delisitan	Gabbro	516 ± 6	N-MORB	Middle ocean ridge	LA-ICPMS zircon U-Pb	Liu, 2011
Kekeerta	Gabbro	457 ± 2	N-MORB	Middle ocean ridge	LA-ICPMS zircon U-Pb	Pei et al., 2018
Kekeerta	Anorthosite	452 ± 9	N-MORB	Middle ocean ridge	LA-ICPMS zircon U-Pb	Pei et al., 2018
Herigougongma	Gabbro	467 ± 4	N-MORB	Middle ocean ridge	LA-ICPMS zircon U-Pb	Pei et al., 2018
Dur'ngoi	Diorite	493 ± 6	IAB	Island arc	SHRIMP zircon U-Pb	Li et al., 2007
Central East Kunlun Suture
Dagele	Gabbro	445 ± 5	SSZ	Island arc	SHRIMP zircon U-Pb	Du et al., 2017
Acite	metagabbro	510 ± 5	SSZ	Island arc	LA-ICPMS zircon U-Pb	Li et al., 2018
Acite	metagabbro	512 ± 4	SSZ	Island arc	LA-ICPMS zircon U-Pb	Li et al., 2018
Qingshuiquan	Gabbro	518 ± 3	SSZ	Island arc	SHRIMP zircon U-Pb	Yang et al., 1996
Qingshuiquan	Gabbro	522 ± 4	SSZ		TIMS zircon U-Pb	Li et al., 2006
Qingshuiquan	Gabbro	481 ± 1	SSZ	Back-arc basin	LA-ICPMS zircon U-Pb	Wei, 2015
Tatuo	Gabbro	522 ± 3	SSZ	Back-arc basin	LA-ICPMS zircon U-Pb	Wei, 2015
Tatuo	Gabbro	505 ± 2	SSZ		LA-ICPMS zircon U-Pb	Dong et al., 2018
Tatuo	Plagiogranite	490 ± 2	SSZ		LA-ICPMS zircon U-Pb	Dong et al., 2018
Qushiang	Gabbro	505 ± 6	SSZ	Back-arc basin	LA-ICPMS zircon U-Pb	Li et al., 2019
Qushiang	Gabbro	498 ± 1	SSZ	Back-arc basin	LA-ICPMS zircon U-Pb	Li et al., 2019
North East Kunlun Suture
Heishan	Gabbro	486 ± 6	SSZ	Initial arc	SHRIMP zircon U-Pb	Meng et al., 2015
Yaziquan	Diorite	480 ± 3		Island arc	LA-ICPMS zircon U-Pb	Cui et al., 2011
References Cui, M.H., Meng, F.C., and Wu, X.K., 2011, Early Ordovician island arc of Qimantag Mountain, eastern Kunlun: evidences from geochemistry, Sm-Nd isotope and geochronology of intermediate-basic igneous rocks [in Chinese with English abstract]: Acta Petrologica Sinica, v. 27, no. 11, p. 3365–3379. Dong, Y.P., He, D.F., Sun, S.S., Liu, X.M., Zhou, X.H., Zhang, F.F., Yang, Z., Cheng, B., Zh…
